# Supplementary material for: Autophagy in Osteosarcoma Cancer Stem Cells Is a Critical Process which Can Be Targeted by the Antipsychotic Drug Thioridazine
Source: MDPI journal article supplement (doi:10.3390/cancers12123675), 2020-12-07

Supplementary Materials:

## Autophagy in Osteosarcoma Cancer Stem Cells Is a Critical Process Which Can Be Targeted by the Antipsychotic Drug Thioridazine

Olivier Camuzard, Marie-Charlotte Trojani, Sabine Santucci-Darmanin, Sophie Pagnotta, Véronique Breuil, Georges F. Carle and Valérie Pierrefite-Carle

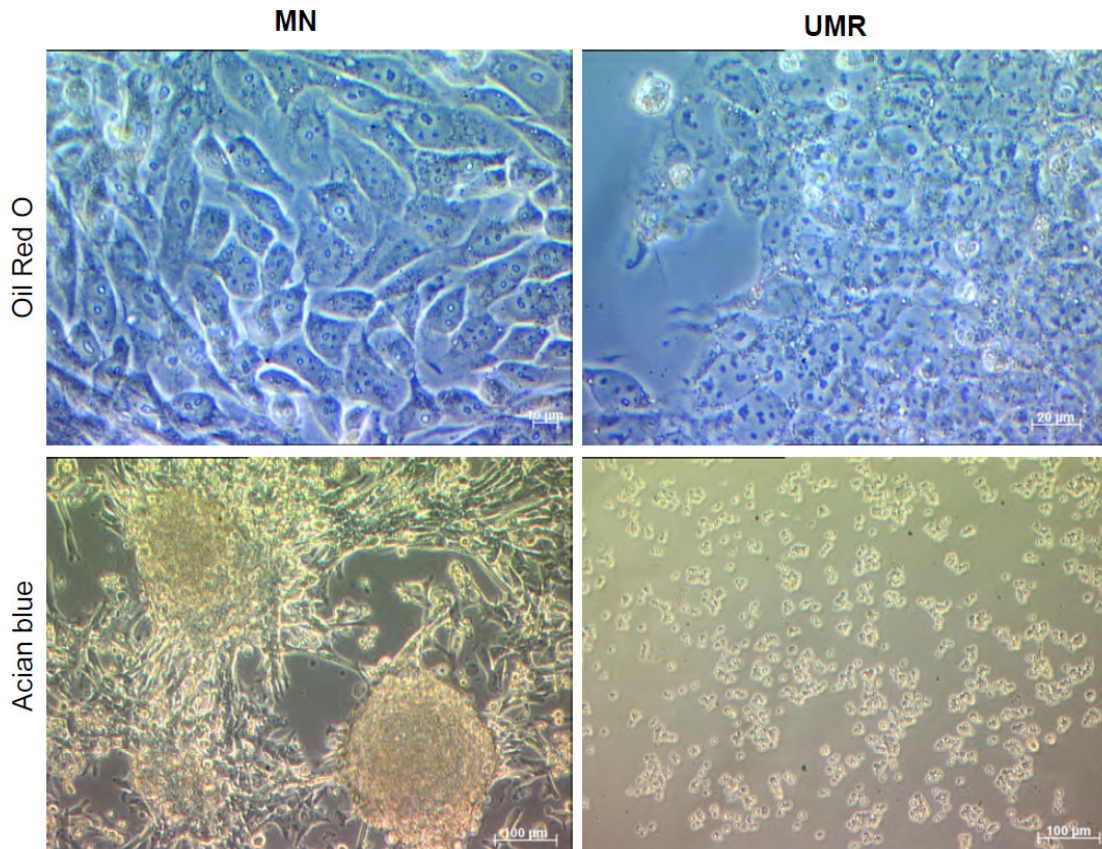

**Figure S1.** Differentiation capabilities of the parental MN and UMR cells towards adipogenic and chondrogenic lineages.

A

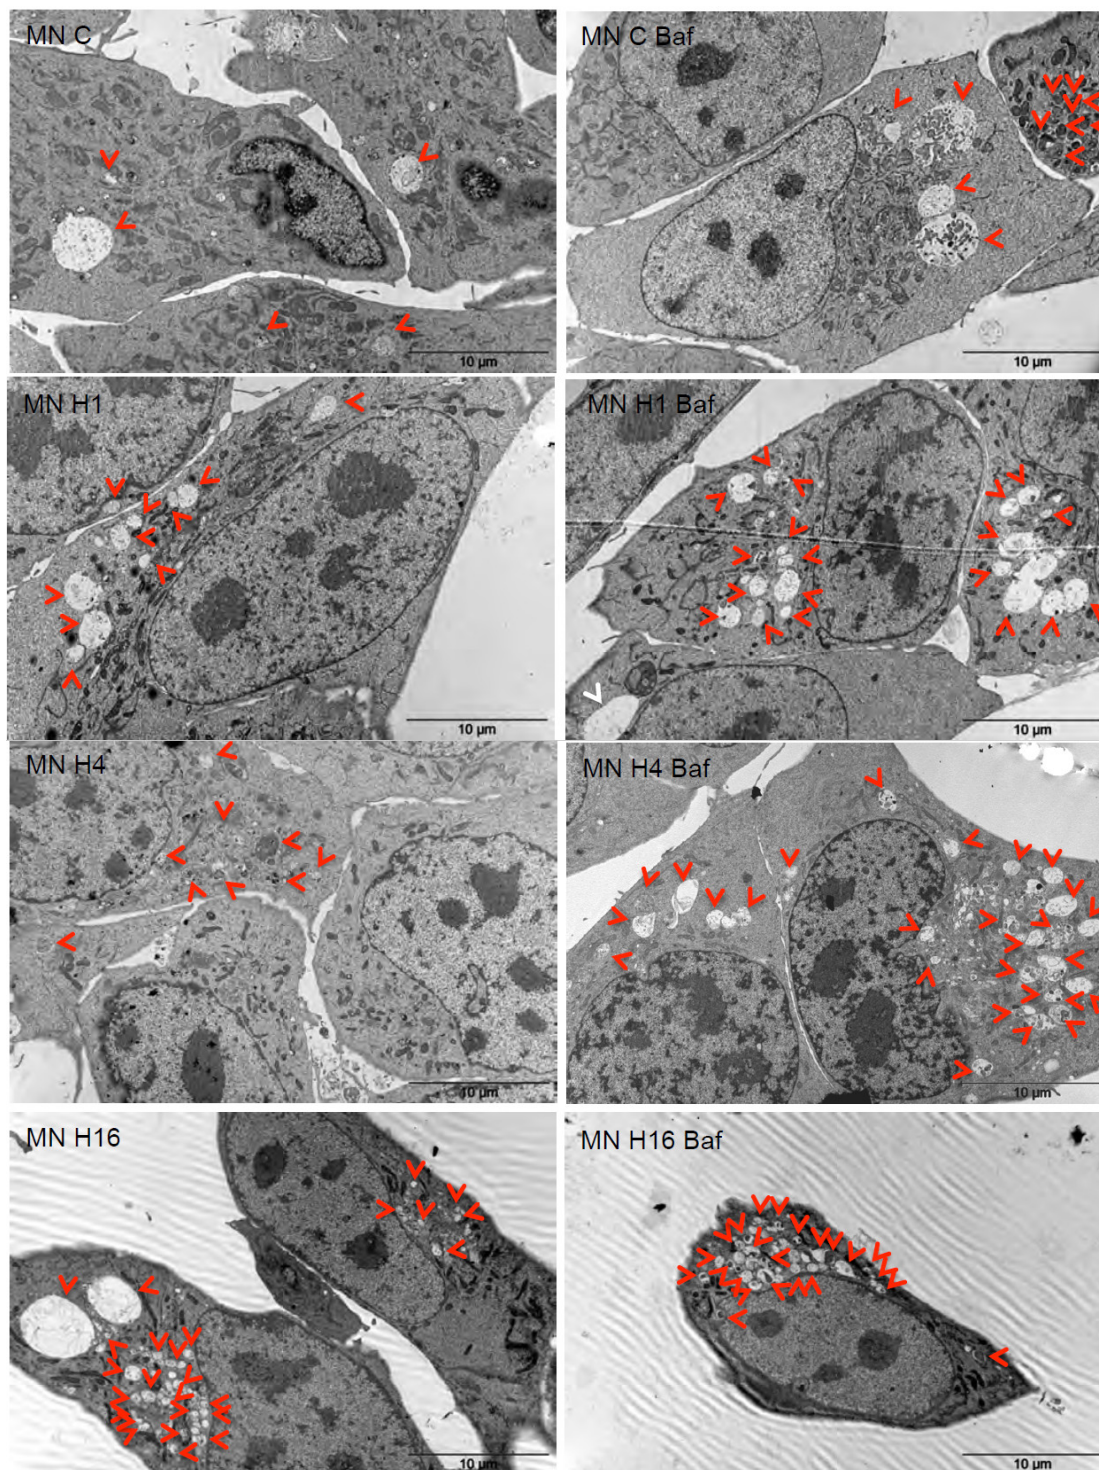



B

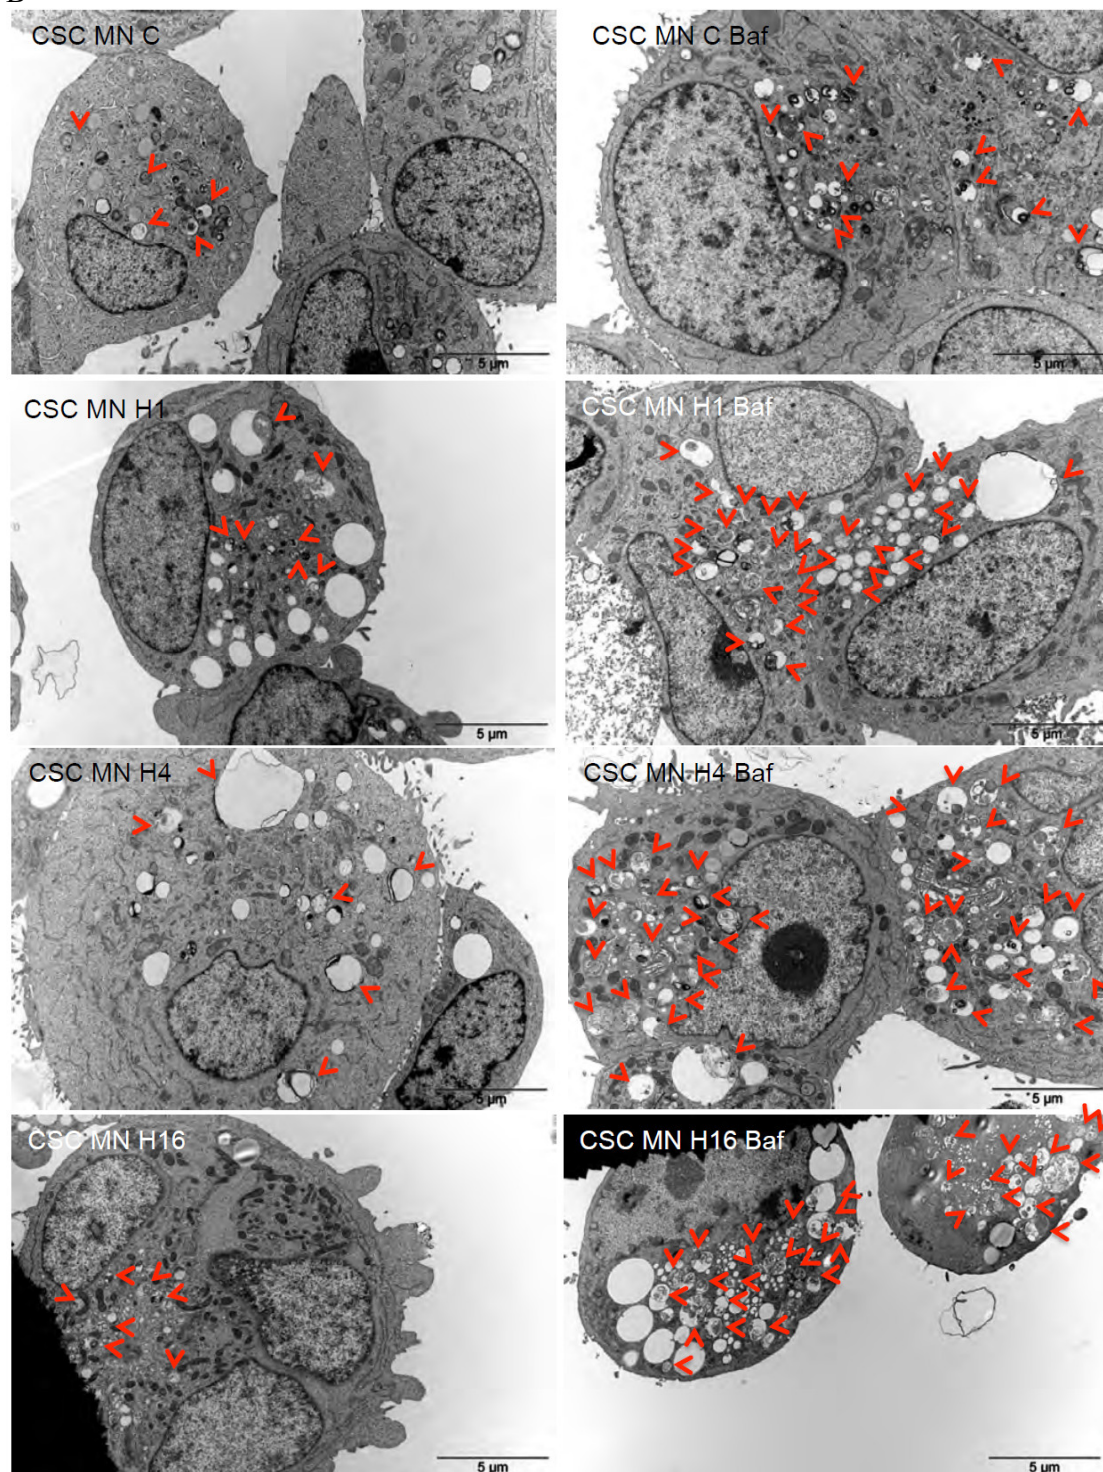

**Figure S2.** TEM analysis of the MN cell line and the corresponding spheres in control and starvation conditions.

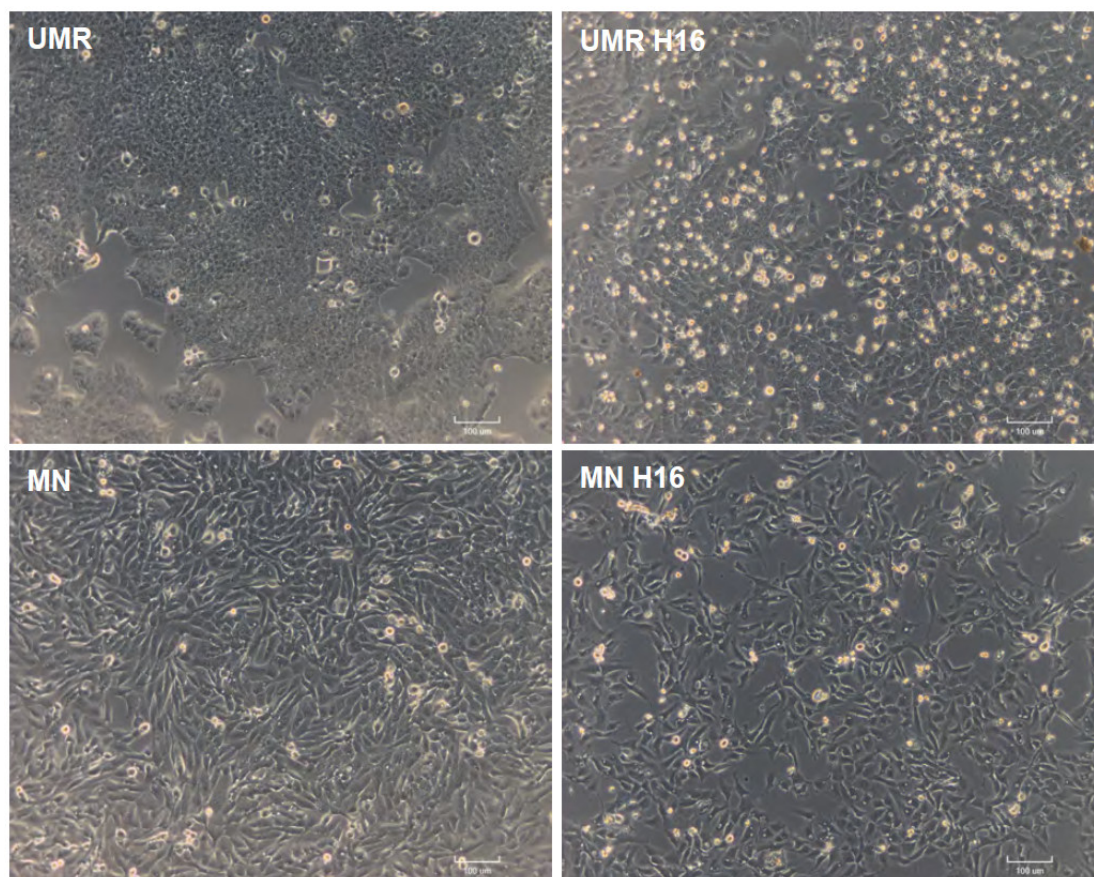

**Figure S3.** Comparison of the mortality rate in UMR and MN cell lines after 16 h in HBSS.



A

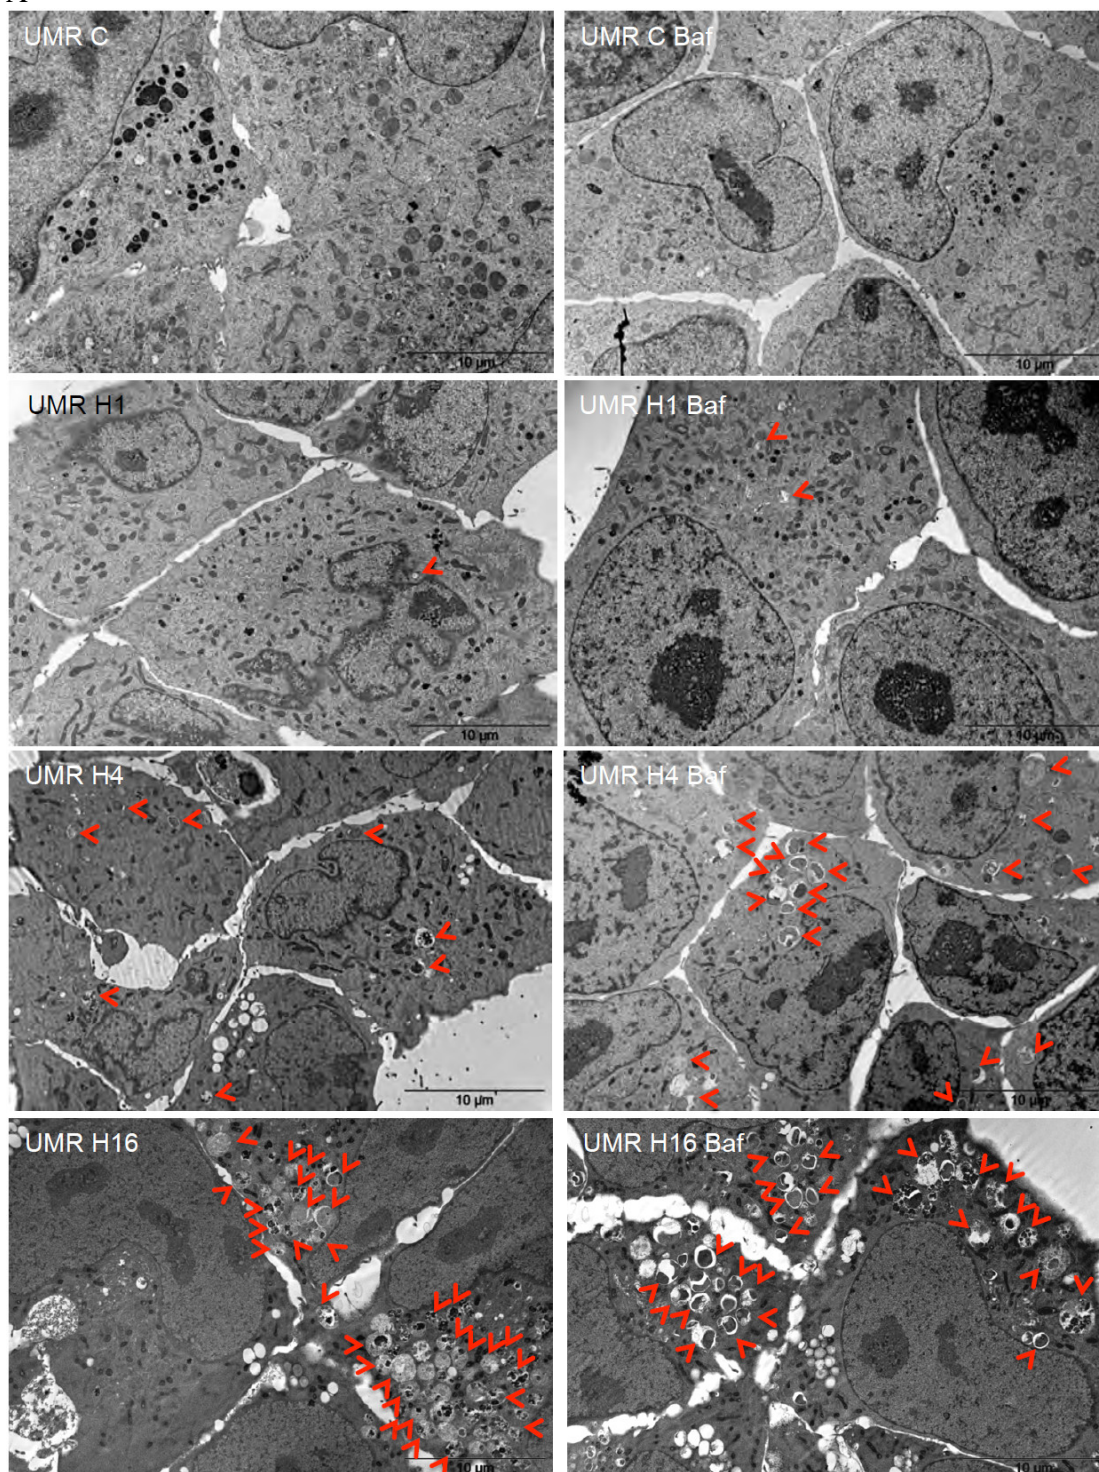



B

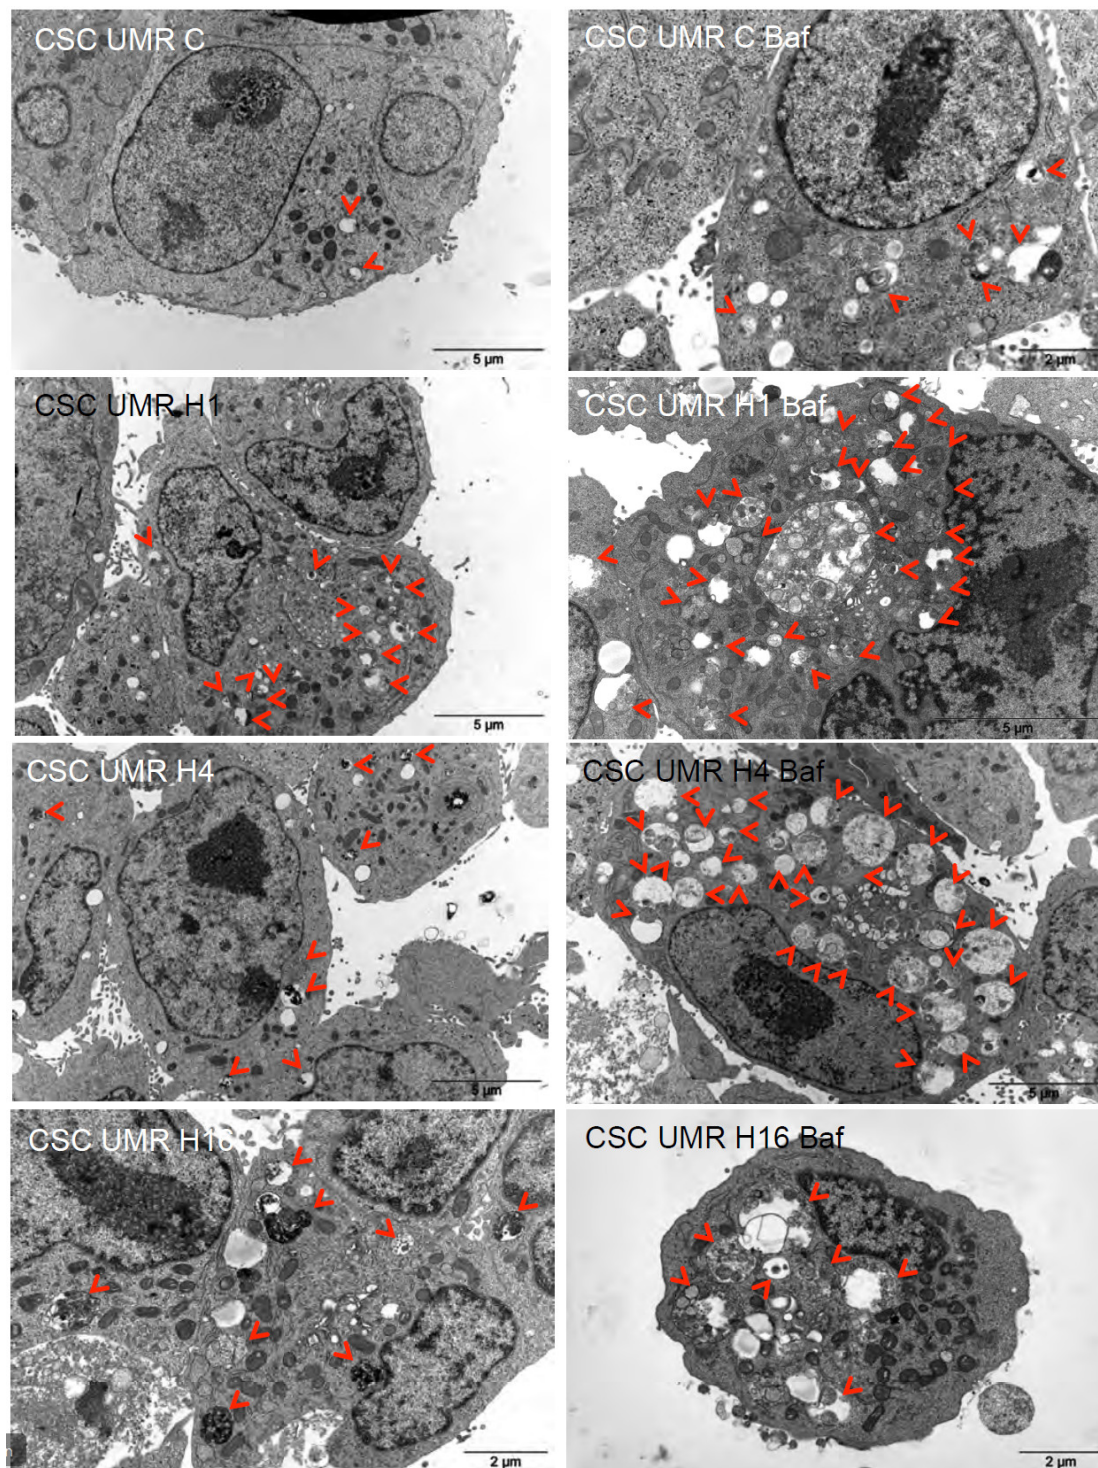

**Figure S4.** TEM analysis of the UMR cell line and the corresponding spheres in control and starvation conditions



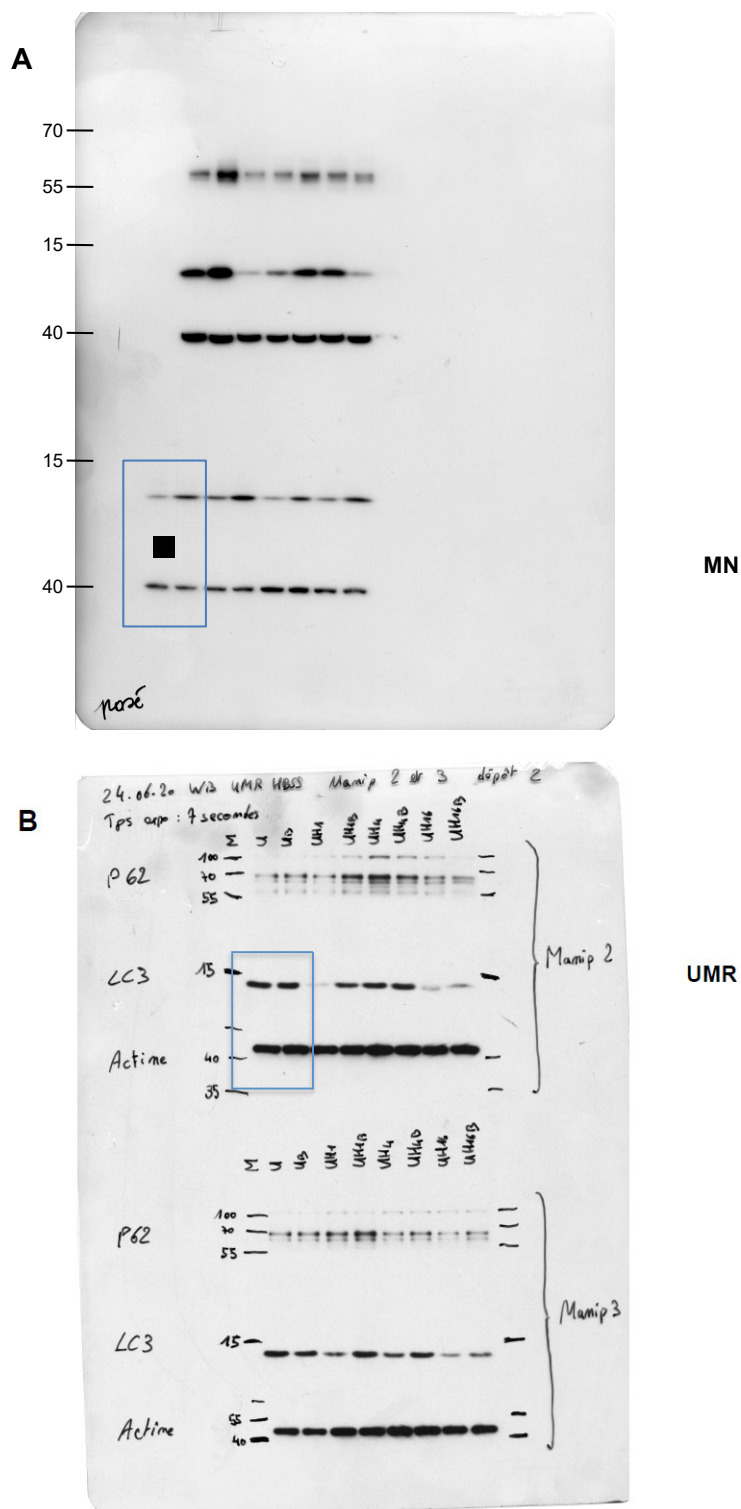

**A**

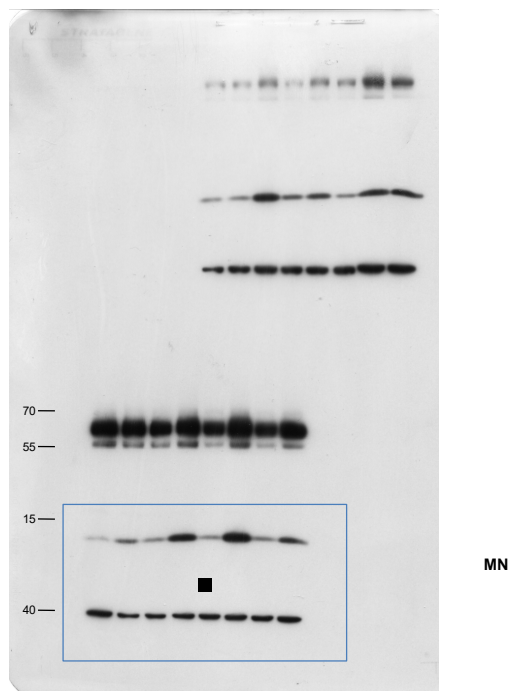

**B**

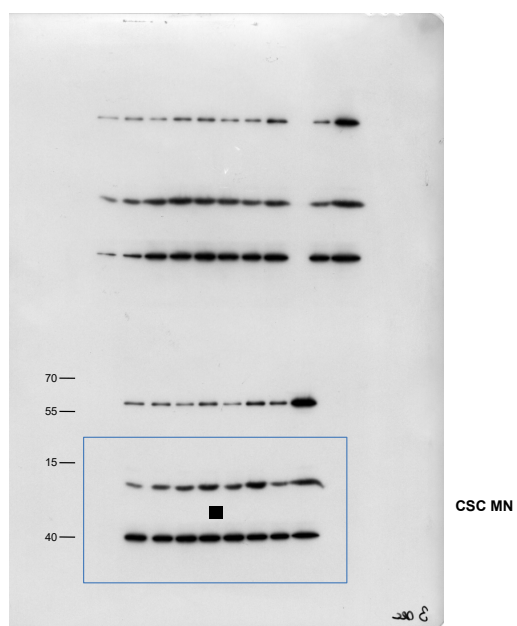

Whole blot for Figure 3



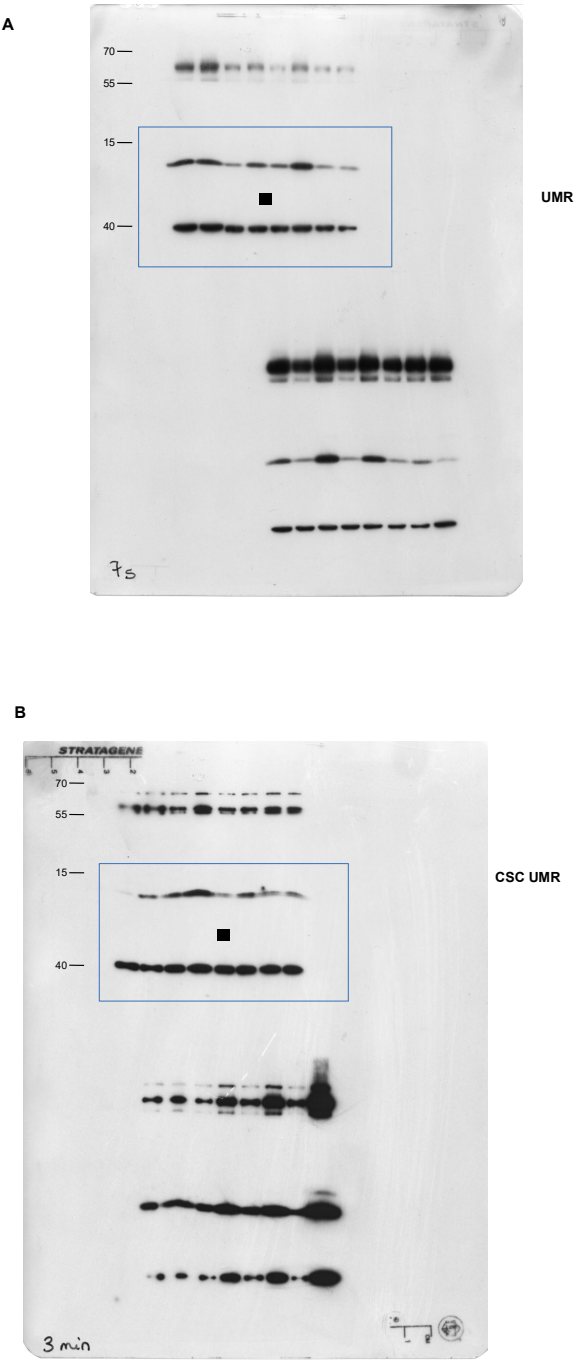

Whole blot for Figure 4

A

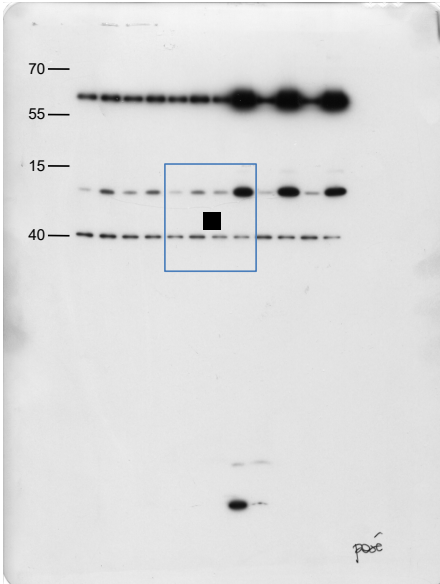

CSC-MN

TZ 1h

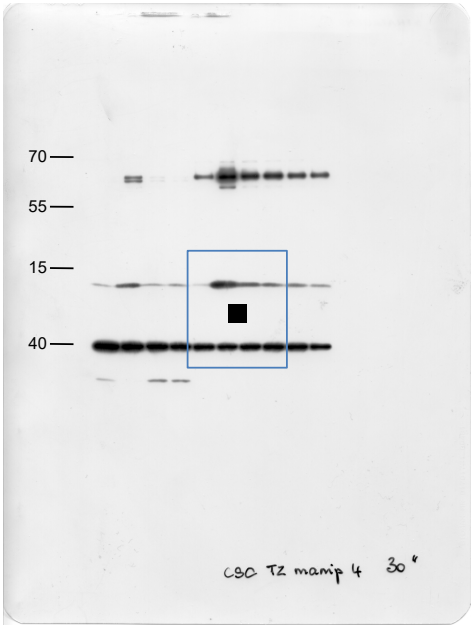

TZ 5h



**B**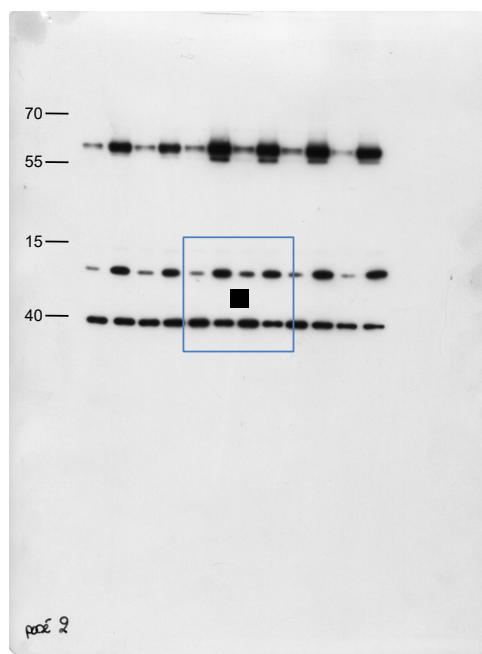

CSC-UMR

TZ 1h

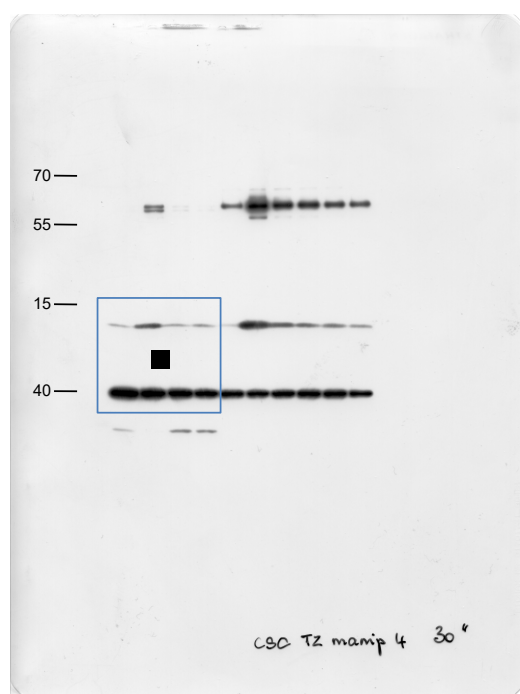

TZ 24h

**Whole blot for Figure 5****Figure S5. Original WB.**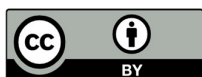

Supplement: s1 [file s1]
